# Supplementary material for: Selection bias on intellectual ability in autism research: a cross-sectional review and meta-analysis
Source: PubMed Central journal article supplement (PMC6397505; doi:10.1186/s13229-019-0260-x), 2019-03-01
Supplement: 13229_2019_260_MOESM1_ESM.pdf [file 13229_2019_260_MOESM1_ESM.pdf]

Table S1: Data extracted for studies included in review.

| 1st Author   | Journal <sup>1</sup> | Country <sup>2</sup> | Field (discipline) <sup>3</sup> | Number of Participants | Number with an ASD | How identified with ASD <sup>4</sup> | Term used to reference autism in title <sup>5</sup> | Setting <sup>6</sup> |
|--------------|----------------------|----------------------|---------------------------------|------------------------|--------------------|--------------------------------------|-----------------------------------------------------|----------------------|
| Adams (1)    | JADD                 | USA                  | Diagnosis                       | 1221                   | 432                | 1                                    | 1                                                   | 3                    |
| Adams (2)    | JADD                 | USA                  | Diagnosis                       | 54                     | 54                 | 1                                    | 1                                                   | 3                    |
| Allen        | JADD                 | UK                   | Psychology                      | 32                     | 16                 | 2                                    | 1                                                   | 2                    |
| Alvares      | Autism Research      | Australia            | Psychology                      | 56                     | 17                 | .                                    | 1                                                   | 1                    |
| Anderson     | JADD                 | UK                   | Diagnosis                       | 15                     | 15                 | 4                                    | 1                                                   | 5                    |
| Anderson     | Autism               | USA                  | Social                          | 334                    | 182                | .                                    | 1                                                   | 3                    |
| Antezana     | JADD                 | USA                  | Psychology                      | 66                     | 41                 | 4                                    | 1                                                   | 1                    |
| Ausderau     | Autism Research      | USA                  | Psychology                      | 960                    | 960                | .                                    | 1                                                   | 3, 5                 |
| Azmitia      | JADD                 | USA                  | Biology                         | 21                     | 10                 | 3                                    | 2                                                   | 3                    |
| Balboni      | JADD                 | Italy                | Diagnosis                       | 52                     | 32                 | 4                                    | 1                                                   | 1                    |
| Baldwin      | Autism               | Australia            | Social                          | 82                     | 82                 | 1                                    | 1                                                   | 5                    |
| Bargiela     | JADD                 | UK                   | Epidemiology                    | 14                     | 14                 | 1                                    | 3                                                   | 5                    |
| Barnard-Brak | Autism Research      | USA                  | Diagnosis                       | 344                    | 253                | .                                    | 4                                                   | 3                    |

<sup>1</sup> JADD = Journal of Autism and Developmental Disorders, MA = Molecular Autism

<sup>2</sup> Country of origin of sample or corresponding author if not specified.

<sup>3</sup> Full field names: Diagnosis, diagnostic scales, identification, screening and scale development; Psychology and cognitive neuroscience; Biology – neuroimaging, neuropathology, genetics and omics; Epidemiology; Interventions; Social, school, education and family circumstances

<sup>4</sup> 1 = Clinical diagnosis, 2 = Autism Diagnostic Observation Schedule, 3 = Autism Diagnostic Interview-Revised, 4 = DSM-4, -5, ICD-9 or -10, 5 = AQ cut-off score, 6 = Educational diagnosis or Special Educational Needs (SEN) classification, 7 = Parent Report of Clinical Diagnosis, 8 = Other (including other ASD scales, medical records, various', self-report)

<sup>5</sup> 1 = Autism Spectrum Disorder(s)/ASD (**73%**), 2 = Autism (**20%**), 3 = Autism Spectrum Condition(s)/ASC (**3%**), 4 = Autism Spectrum (**2%**), 5 = Autistic (**2%**)

<sup>6</sup> Setting where participants recruited from. 1 = hospital/clinic/centre, 2 = school, 3 = database/registry/larger study, 4 = university, 5 = online/families/support groups/community groups/charities

[Type here]

|                    |                 |           |               |      |      |   |   |      |
|--------------------|-----------------|-----------|---------------|------|------|---|---|------|
| Barnevik Olsson    | JADD            | Sweden    | Interventions | 128  | 128  | 1 | 2 | 1    |
| Bearss             | Autism          | USA       | Interventions | 93   | 45   | 1 | 1 | .    |
| Bedford            | Autism Research | UK        | Diagnosis     | 104  | 17   | 4 | 5 | 1    |
| Bedford            | Autism Research | UK        | Psychology    | 30   | 16   | 4 | 1 | 3, 2 |
| Begeer             | Autism          | NL        | Social        | 51   | 28   | . | 2 | 2    |
| Ben-Itzhak         | JADD            | Israel    | Psychology    | 43   | 20   | 1 | 1 | 1    |
| Benning            | JADD            | USA       | Psychology    | 69   | 35   | 1 | 1 | .    |
| Benson             | Autism Research | UK        | Psychology    | 43   | 19   | 1 | 2 | 5    |
| Biggs              | JADD            | USA       | Diagnosis     | 389  | 232  | 6 | 2 | 5    |
| Bilaver            | JADD            | USA       | Interventions | 3104 | 250  | 8 | 1 | 3    |
| Bishop-Fitzpatrick | JADD            | USA       | Diagnosis     | 180  | 180  | 7 | 1 | 3    |
| Blackmon           | Autism Research | USA       | Psychology    | 130  | 130  | 4 | 1 | 1    |
| Blumberg           | Autism          | USA       | Diagnosis     | 1607 | 1420 | . | 1 | 3    |
| Bolic Baric        | Autism          | Sweden    | Social        | 13   | 10   | 4 | 1 | 3    |
| Bottema-Beutel     | JADD            | USA       | Psychology    | 28   | 9    | 4 | 3 | 3    |
| Bottema-Beutel     | Autism          | USA       | Interventions | 33   | 33   | . | 1 | 2    |
| Bouvet             | JADD            | France    | Psychology    | 25   | 12   | 8 | 1 | 1    |
| Brett              | JADD            | UK        | Diagnosis     | 2134 | 2134 | 7 | 1 | 3    |
| Brewer             | Autism Research | UK        | Psychology    | 27   | 14   | . | 1 | .    |
| Brian              | Autism          | Canada    | Diagnosis     | 67   | 23   | . | 1 | 3    |
| Brooks             | JADD            | USA       | Interventions | 41   | 10   | 1 | 1 | 1    |
| Brosnan            | Autism          | UK        | Psychology    | 82   | 26   | . | 1 | 2    |
| Brosnan (2)        | JADD            | UK        | Psychology    | 75   | 75   | 4 | 4 | 5    |
| Burger-Caplan      | Autism          | USA       | Psychology    | 80   | 23   | . | 1 | .    |
| Cage               | JADD            | UK        | Psychology    | 66   | 33   | 2 | 4 | 2    |
| Cai                | JADD            | Australia | Diagnosis     | 38   | 23   | 1 | 1 | 4    |
| Campione           | JADD            | Italy     | Biology       | 20   | 9    | 4 | 1 | 1    |

[Type here]

|               |                 |           |               |       |      |   |   |      |
|---------------|-----------------|-----------|---------------|-------|------|---|---|------|
| Caplan        | JADD            | USA       | Diagnosis     | 162   | 162  | 1 | 1 | 5    |
| Carmo         | JADD            | Portugal  | Psychology    | 39    | 19   | 4 | 1 | 3    |
| Cascio        | JADD            | USA       | Psychology    | 109   | 33   | 1 | 1 | 3, 5 |
| Chamak        | JADD            | France    | Diagnosis     | 76    | 76   | 7 | 1 | .    |
| Chang         | Autism          | USA       | Psychology    | 31    | 31   | . | 1 | 2    |
| Chen          | JADD            | Australia | Social        | 30    | 30   | 4 | 1 | 1    |
| Chen          | Autism Research | Taiwan    | Biology       | 72    | 37   | . | 1 | 1    |
| Chen          | Autism Research | China     | Biology       | 656   | 312  | . | 1 | 3    |
| Chiang        | Autism          | Taiwan    | Interventions | 34    | 34   | . | 1 | 1, 5 |
| Chien         | Autism Research | Taiwan    | Biology       | 73    | 37   | . | 2 | 4    |
| Chiu          | Autism Research | Canada    | Biology       | 28    | 28   | . | 1 | 3    |
| Cholemky      | JADD            | Germany   | Diagnosis     | 463   | 463  | 4 | 1 | 1    |
| Choque Olsson | Autism          | Sweden    | Social        | 22    | 11   | 4 | 2 | 3    |
| Chowdhury     | Autism          | USA       | Diagnosis     | 242   | 242  | . | 1 | 3    |
| Christiansz   | JADD            | Australia | Diagnosis     | 185   | 126  | 4 | 1 | 1    |
| Connolloy     | Autism Research | USA       | Epidemiology  | 40846 | 503  | . | 1 | 1    |
| Conson        | JADD            | Italy     | Psychology    | 36    | 18   | 3 | 1 | .    |
| Cooper        | JADD            | UK        | Psychology    | 48    | 24   | 1 | 3 | 3    |
| Corbett       | JADD            | USA       | Interventions | 30    | 30   | 1 | 1 | .    |
| Coster        | Autism          | USA       | Diagnosis     | 365   | 365  | . | 1 | 5    |
| Cox           | JADD            | USA       | Psychology    | 44    | 17   | 1 | 1 | 3    |
| Crawford      | MA              | UK        | Biology       | 32    | 16   | 1 | 2 | 2    |
| Crea          | JADD            | Australia | Epidemiology  | 58    | 16   | 3 | 1 | 3    |
| Cummings      | JADD            | USA       | Epidemiology  | 91520 | 8325 | 1 | 1 | 1    |
| Davids        | JADD            | NL        | Psychology    | 72    | 36   | 1 | 1 | 1    |
| de Bildt      | JADD            | NL        | Diagnosis     | 93    | 38   | 1 | 1 | .    |
| Dekker        | JADD            | NL        | Interventions | 86    | 86   | 1 | 1 | 1    |
| Demopoulos    | Autism Research | USA       | Psychology    | 76    | 60   | . | 1 | 3    |

[Type here]

|                 |                 |             |               |        |      |   |   |            |
|-----------------|-----------------|-------------|---------------|--------|------|---|---|------------|
| Dempsey         | JADD            | USA         | Psychology    | 2341   | 2341 | 1 | 1 | 3          |
| DiCriscio       | JADD            | USA         | Psychology    | 47     | 19   | . | 2 | 3          |
| Dolan           | JADD            | USA         | Interventions | 62     | 58   | . | 1 | 5          |
| Doumas          | JADD            | UK          | Psychology    | 30     | 15   | 1 | 1 | 5          |
| Durieux         | Autism Research | UK          | Biology       | 50     | 21   | . | 1 | 1          |
| Dynia           | JADD            | USA         | Psychology    | 70     | 35   | 6 | 1 | 2          |
| Edmiston        | JADD            | USA         | Social        | 34     | 21   | 1 | 1 | 1, 2, 4, 5 |
| Ekhlaspour      | JADD            | USA         | Biology       | 18     | 9    | 4 | 1 | .          |
| Ellis Weismer   | JADD            | USA         | Psychology    | 60     | 30   | 2 | 1 | 1, 3       |
| Eussen          | Autism Research | Netherlands | Psychology    | 87     | 63   | . | 1 | 1          |
| Eversole        | JADD            | USA         | Social        | 131    | 67   | 7 | 1 | 2          |
| Factor          | JADD            | USA         | Psychology    | 44     | 44   | 1 | 1 | 5          |
| Fairthorne      | Autism          | Australia   | Epidemiology  | 272947 | 1698 | . | 1 | 3          |
| Faja            | Autism Research | USA         | Psychology    | 66     | 66   | 3 | 1 | 1, 2, 5    |
| Fernandes (1)   | JADD            | Sweden      | Social        | 108    | 108  | 1 | 1 | 1          |
| Fernandes (2)   | JADD            | Sweden      | Social        | 76     | 76   | 1 | 1 | 1          |
| Field           | JADD            | UK          | Psychology    | 124    | 51   | 1 | 1 | 2, 5       |
| Findon          | Autism Research | UK          | Diagnosis     | 224    | 98   | . | 1 | 1, 3, 5    |
| Fiorentino      | MA              | USA         | Biology       | 54     | 20   | 8 | 1 | 3          |
| Fisher          | Autism          | USA         | Social        | 30     | 30   | . | 1 | 3          |
| Fletcher-Watson | Autism          | UK          | Interventions | 54     | 54   | . | 2 | 1          |
| Floris          | MA              | USA         | Biology       | 118    | 42   | 1 | 2 | 1, 2       |
| Fombonne        | JADD            | Mexico      | Epidemiology  | 36     | 36   | 1 | 1 | 2          |
| Forbes          | JADD            | UK          | Psychology    | 51     | 26   | 1 | 1 | 3          |
| Forgeot d'Arc   | MA              | Canada      | Psychology    | 39     | 20   | 1 | 1 | 1          |
| Foster          | JADD            | Canada      | Psychology    | 72     | 32   | 4 | 1 | 3          |
| Fridenson-Hayo  | MA              | Israel,     | Psychology    | 113    | 55   | 1 | 2 | 1, 2, 3, 5 |

[Type here]

|          |                 | Britain,<br>Sweden |               |       |     |   |   |         |  |
|----------|-----------------|--------------------|---------------|-------|-----|---|---|---------|--|
| Fujioka  | MA              | Japan              | Psychology    | 56    | 21  | 4 | 1 | 1       |  |
| Gevi     | MA              | Italy              | Biology       | 60    | 30  | 4 | 5 | .       |  |
| Gilson   | JADD            | USA                | Interventions | 3     | 2   | 6 | 2 | 4       |  |
| Ginevra  | Autism Research | Italy              | Psychology    | 269   | 82  | . | 2 | 2       |  |
| Granich  | Autism          | Australia          | Epidemiology  | 208   | 208 | . | 1 | 5       |  |
| Green    | JADD            | UK                 | Social        | 54    | 16  | 3 | 1 | 5       |  |
| Griffin  | Autism Research | UK                 | Psychology    | 56    | 24  | 4 | 1 | 2, 3, 5 |  |
| Grove    | Autism Research | UK                 | Diagnosis     | 267   | 158 | . | 2 | 3, 4    |  |
| Guy      | Autism Research | Canada             | Psychology    | 89    | 34  | . | 1 | 1       |  |
| Haas     | JADD            | Australia          | Social        | 167   | 77  | 8 | 1 | 4, 5    |  |
| Hagmann  | JADD            | USA                | Psychology    | 69    | 16  | 2 | 2 | 2, 4, 5 |  |
| Haigh    | Autism Research | USA                | Psychology    | 34    | 17  | . | 2 | .       |  |
| Hanaie   | Autism Research | Japan              | Biology       | 39    | 19  | . | 1 | 1       |  |
| Hannah   | JADD            | UK                 | Social        | 40    | 20  | 1 | 1 | .       |  |
| Happé    | JADD            | UK                 | Diagnosis     | 146   | 100 | 6 | 1 | 1       |  |
| Hare     | Autism          | UK                 | Interventions | 9     | 9   | 4 | 2 | 5       |  |
| Harriage | JADD            | USA                | Interventions | 6     | 3   | 1 | 2 | 1, 5    |  |
| Harrop   | Autism          | USA                | Psychology    | 85    | 85  | . | 1 | .       |  |
| Havdahl  | Autism Research | USA                | Diagnosis     | 389   | 226 | . | 1 | 1       |  |
| Hayes    | JADD            | UK                 | Psychology    | 30    | 15  | 2 | 1 | 4       |  |
| Hecht    | Autism Research | USA &<br>Canada    | Epidemiology  | 158   | 158 | . | 1 | 3       |  |
| Helt     | JADD            | USA                | Psychology    | 86    | 43  | 2 | 1 | 2       |  |
| Hepburn  | Autism          | USA                | Interventions | 33    | 33  | 1 | 1 | 5       |  |
| Hewitt   | JADD            | USA                | Epidemiology  | 12329 | 255 | 6 | 1 | 3       |  |
| Hiller   | Autism          | Australia          | Diagnosis     | 152   | 152 | . | 1 | 1, 5    |  |

[Type here]

|              |                 |           |               |         |       |     |   |   |
|--------------|-----------------|-----------|---------------|---------|-------|-----|---|---|
| Hoffmann (1) | JADD            | Germany   | Biology       | 50      | 2     | 4   | 2 | 1 |
| Hoffmann (2) | JADD            | Germany   | Biology       | 155     | 78    | 4   | 2 | 3 |
| Holmes       | Autism          | USA       | Social        | 198     | 198   | .   | 1 | 5 |
| Hong         | JADD            | USA       | Social        | 120     | 60    | .   | 1 | 3 |
| Howe         | JADD            | UK        | Social        | 16      | 16    | 1   | 3 | 2 |
| Hranilovic   | Autism Research | Croatia   | Biology       | 156     | 90    | 4   | 5 | 1 |
| Hundley      | JADD            | USA       | Psychology    | 532     | 532   | 2   | 1 | 3 |
| Hyman        | JADD            | USA       | Interventions | 14      | 14    | 1   | 2 | 1 |
| Ibrahim      | JADD            | Canada    | Biology       | 40      | 20    | 2   | 1 | 3 |
| Irvine       | JADD            | USA       | Psychology    | 46      | 24    | 4   | 2 | 3 |
| Ishizuka     | Autism          | Japan     | Interventions | 6       | 6     | 1   | 1 | 1 |
| Izuwah       | Autism Research | Nigeria   | Epidemiology  | 75      | 75    | .   | 2 | 1 |
| Jaime        | JADD            | USA       | Biology       | 33      | 16    | 2   | 1 | 3 |
| Jashar       | JADD            | USA       | Diagnosis     | 281     | 146   | 2   | 2 | 1 |
| Kaartinen    | JADD            | Finland   | Psychology    | 36      | 18    | 1   | 1 | 1 |
| Kalb         | JADD            | USA       | Epidemiology  | 6416785 | 15532 | 4   | 1 | 3 |
| Kana         | Autism Research | USA       | Biology       | 32      | 17    | 3   | 2 | 1 |
| Kanduri      | Autism Research | Finland   | Social        | 349     | 80    | 4   | 1 | 5 |
| Karhson      | Autism Research | USA       | Biology       | 25      | 12    | 2,3 | 1 | 5 |
| Kauschke     | JADD            | Germany   | Social        | 33      | 22    | 2   | 1 | 1 |
| Keehn        | JADD            | USA       | Psychology    | 52      | 22    | 2   | 2 | . |
| Keehn        | Autism Research | USA       | Psychology    | 64      | 32    | 4   | 2 | . |
| Kern Koegel  | JADD            | USA       | Interventions | 3       | 3     | 4   | 1 | 1 |
| Kinnear      | JADD            | USA       | Social        | 502     | 502   | 4   | 1 | 2 |
| Kirby        | JADD            | USA       | Social        | 1170    | 1170  | 6   | 1 | 3 |
| Kirkovski    | JADD            | Australia | Biology       | 50      | 27    | 4   | 1 | . |
| Kitzerow     | Autism Research | Germany   | Diagnosis     | 21      | 21    | 2   | 2 | 3 |
| Kleinhaus    | JADD            | USA       | Biology       | 52      | 27    | 3   | 2 | . |

[Type here]

|             |                 |                   |               |       |      |     |   |      |
|-------------|-----------------|-------------------|---------------|-------|------|-----|---|------|
| Kleinhans   | Autism Research | USA               | Biology       | 53    | 25   | 4   | 1 | .    |
| Koolschijn  | JADD            | NL                | Biology       | 100   | 51   | 1   | 1 | 3    |
| Kovarski    | JADD            | France            | Psychology    | 42    | 20   | 1   | 2 | 1    |
| Kranz       | Autism Research | Germany           | Social        | 667   | 667  | 4   | 1 | 1    |
| Kumazaki    | MA              | Japan             | Psychology    | 43    | 20   | 4   | 1 | 1    |
| Lehnhardt   | JADD            | Germany           | Psychology    | 107   | 107  | 1   | 1 | 1    |
| Lever       | Autism Research | NL                | Psychology    | 236   | 118  | 4   | 1 | 1    |
| Li          | JADD            | China             | Psychology    | 60    | 30   | 4   | 1 | 2    |
| Libero      | Autism Research | USA               | Social        | 40    | 20   | 3   | 2 | .    |
| Liew        | Autism Research | Denmark           | Epidemiology  | 64322 | 1027 | 4   | 1 | 3    |
| Lim         | Autism Research | Oman              | Biology       | 27    | 15   | 4   | 2 | 1    |
| Liu         | Autism Research | Japan &<br>Taiwan | Social        | 1615  | 789  | 4,3 | 1 | 5    |
| Locke       | Autism          | USA               | Social        | 102   | 51   | .   | 1 | 3    |
| Luo         | Autism Research | USA               | Psychology    | 156   | 26   | 4   | 1 | 1, 5 |
| Ma          | JADD            | USA               | Psychology    | 7     | 4    | 8   | 2 | 3    |
| Macizo      | JADD            | Spain             | Psychology    | 40    | 20   | 4   | 1 | 2    |
| Mackie      | Autism Research | USA               | Psychology    | 30    | 15   | 4   | 1 | 1    |
| MacMullin   | Autism          | Canada &<br>USA   | Social        | 311   | 139  | .   | 1 | 5    |
| Mandy       | Autism          | UK                | Interventions | 37    | 37   | .   | 1 | 2    |
| Mari-Bauset | JADD            | Spain             | Interventions | 105   | 105  | 2   | 1 | 2    |
| Marini      | JADD            | Italy             | Psychology    | 154   | 77   | 2   | 1 | 1    |
| Marler      | JADD            | USA               | Biology       | 82    | 82   | 4   | 1 | 3    |
| Mazurek     | JADD            | USA               | Psychology    | 162   | 81   | 2   | 1 | 1    |
| McCormick   | Autism          | USA               | Psychology    | 79    | 26   | .   | 1 | 1, 5 |
| McCoy       | JADD            | USA               | Epidemiology  | 42747 | 915  | 7   | 1 | 3    |
| McVey       | JADD            | USA               | Interventions | 47    | 47   | 1   | 1 | 1, 5 |

[Type here]

|                |                 |           |               |     |     |   |   |      |
|----------------|-----------------|-----------|---------------|-----|-----|---|---|------|
| Mhatre         | JADD            | India     | Social        | 80  | 80  | 1 | 1 | 1    |
| Minshawi       | MA              | USA       | Interventions | 101 | 67  | 4 | 1 | 1    |
| Moore          | Autism          | UK        | Psychology    | 38  | 19  | . | 1 | 2, 5 |
| Morett         | JADD            | USA       | Social        | 39  | 18  | . | 1 | .    |
| Mouga          | JADD            | Portugal  | Psychology    | 445 | 224 | 3 | 4 | 1    |
| Muller         | JADD            | Germany   | Diagnosis     | 56  | 33  | 2 | 1 | 3    |
| Murdaugh       | Autism Research | USA       | Interventions | 45  | 26  | 1 | 2 | .    |
| Mutluer        | Autism Research | Turkey    | Psychology    | 117 | 64  | 1 | 1 | 2    |
| Nader          | JADD            | Canada    | Diagnosis     | 47  | 25  | 4 | 5 | 3    |
| Neuhaus        | Autism Research | USA       | Biology       | 36  | 18  | . | 2 | 3    |
| Newbutt        | JADD            | USA       | Interventions | 29  | 29  | . | 2 | 5    |
| Nguyen         | MA              | France    | Biology       | 14  | 8   | 1 | 2 | .    |
| Noroozi        | Autism Research | Iran      | Social        | 990 | 518 | . | 2 | .    |
| Nuske          | MA              | USA       | Psychology    | 40  | 20  | 1 | 2 | 5    |
| O'Brien        | JADD            | USA       | Interventions | 5   | 5   | 6 | 2 | .    |
| O'Hearn        | Autism Research | USA       | Biology       | 26  | 13  | . | 2 | 1    |
| Oerlemans      | JADD            | NL        | Social        | 237 | 145 | 3 | 1 | 1    |
| Olincy         | JADD            | USA       | Biology       | 2   | 2   | 2 | 1 | .    |
| Ostfeld-Etzion | Autism          | Israel    | Psychology    | 80  | 40  | . | 1 | 1    |
| Oswald         | JADD            | USA       | Psychology    | 64  | 32  | 1 | 1 | 3, 2 |
| Oswald         | Autism Research | USA       | Psychology    | 54  | 27  | . | 1 | 3    |
| Pang           | Autism Research | Canada    | Biology       | 42  | 21  | 4 | 1 | 3    |
| Parsons        | JADD            | USA       | Psychology    | 18  | 8   | 1 | 1 | 4    |
| Pearson        | Autism Research | UK        | Psychology    | 60  | 30  | . | 3 | 2    |
| Peckett        | Autism          | UK        | Interventions | 15  | 5   | . | 3 | 1    |
| Pellecchia     | Autism          | USA       | Interventions | 152 | 152 | . | 2 | 3    |
| Petrina        | JADD            | Australia | Social        | 90  | 45  | 4 | 1 | 3    |
| Poopal         | MA              | USA       | Biology       | 101 | 58  | 1 | 2 | 1    |



[Type here]

|                |                 |             |               |       |     |   |   |      |
|----------------|-----------------|-------------|---------------|-------|-----|---|---|------|
| Popple         | JADD            | USA         | Interventions | 18    | 18  | . | 1 | 1    |
| Powell         | Autism          | UK          | Interventions | 17    | 17  | . | 2 | 1    |
| Pruitt         | Autism          | USA         | Social        | 166   | 83  | . | 1 | 3    |
| Pugliese       | JADD            | USA         | Psychology    | 64    | 64  | 1 | 1 | 1    |
| Radley         | Autism          | USA         | Interventions | 4     | 2   | . | 1 | 2    |
| Rankin         | JADD            | USA         | Social        | 148   | 74  | 8 | 1 | 1, 5 |
| Rausch         | MA              | Netherlands | Biology       | 45    | 20  | 1 | 1 | 1    |
| Retico         | MA              | Italy       | Biology       | 152   | 76  | 4 | 1 | 1    |
| Riches         | JADD            | UK          | Psychology    | 61    | 30  | 4 | 1 | 3    |
| Ring           | Autism Research | UK          | Psychology    | 36    | 18  | . | 1 | 5    |
| Roberts        | Autism          | USA         | Epidemiology  | 54512 | 451 | . | 1 | 3    |
| Robinson       | JADD            | UK          | Psychology    | 6     | 6   | 4 | 4 | 5    |
| Rodgers        | Autism Research | UK          | Diagnosis     | 157   | 157 | 1 | 1 | 3    |
| Rollins        | Autism          | USA         | Interventions | 4     | 4   | . | 1 | 1    |
| Rosa           | Autism          | Spain       | Epidemiology  | 128   | 50  | 1 | 1 | 1    |
| Rosen          | JADD            | USA         | Psychology    | 17    | 17  | 4 | 1 | 3    |
| Rosso          | JADD            | Australia   | Social        | 24    | 20  | 6 | 1 | 2    |
| Rudra          | MA              | India       | Psychology    | 51    | 25  | 1 | 3 | 1    |
| Russell        | Autism          | UK          | Psychology    | 859   | 474 | . | 1 | 1    |
| Rutherford     | Autism          | UK          | Epidemiology  | 150   | 150 | . | 1 | 1    |
| Rutherford (1) | Autism          | USA         | Psychology    | 18    | 18  | . | 1 | 3    |
| Rutherford (2) | Autism          | USA         | Psychology    | 17    | 17  | . | 1 | 1    |
| Ryan           | JADD            | Ireland     | Psychology    | 93    | 60  | 2 | 2 | 1    |
| Rynkiewicz     | MA              | Poland      | Social        | 33    | 33  | 4 | 2 | 3    |
| Sabatos-DeVito | JADD            | USA         | Psychology    | 50    | 19  | 3 | 2 | 1, 5 |
| Sasson         | JADD            | USA         | Psychology    | 49    | 21  | 2 | 2 | 3    |
| Scheeren       | JADD            | NL          | Psychology    | 173   | 132 | 4 | 1 | 2    |

[Type here]

|             |                 |         |               |      |      |   |   |      |
|-------------|-----------------|---------|---------------|------|------|---|---|------|
| Schertz     | JADD            | USA     | Psychology    | 143  | 143  | 2 | 4 | 3    |
| Schuh       | Autism Research | USA     | Psychology    | 35   | 13   | . | 1 | .    |
| Schunke     | Autism          | Germany | Psychology    | 40   | 20   | . | 2 | .    |
| Schuwerk    | JADD            | Germany | Psychology    | 85   | 44   | 4 | 3 | 1, 5 |
| Schwartzman | JADD            | USA     | Psychology    | 828  | 354  | 8 | 1 | 5    |
| Senland     | JADD            | USA     | Social        | 44   | 22   | 1 | 1 | 5    |
| Shah        | MA              | UK      | Diagnosis     | 40   | 20   | 4 | 1 | 3    |
| Sharer      | Autism Research | USA     | Psychology    | 29   | 18   | . | 1 | 5    |
| Shen        | Autism Research | China   | Social        | 1504 | 430  | . | 2 | 1    |
| Shield      | Autism Research | USA     | Psychology    | 35   | 17   | 2 | 1 | 5    |
| Shirama     | JADD            | Japan   | Psychology    | 32   | 16   | 1 | 1 | 1    |
| Simmons     | JADD            | USA     | Interventions | 50   | 27   | 6 | 1 | 1    |
| Şimşek      | Autism Research | Turkey  | Social        | 61   | 35   | . | 1 | 1    |
| Simut       | JADD            | Belgium | Social        | 30   | 30   | . | 1 | 2    |
| Singer      | JADD            | USA     | Epidemiology  | 1173 | 463  | . | 1 | 3    |
| Skewes      | JADD            | Denmark | Psychology    | 32   | 14   | 2 | 1 | .    |
| Slappendel  | JADD            | NL      | Diagnosis     | 198  | 50   | 1 | 1 | 1    |
| Smith       | JADD            | UK      | Psychology    | 42   | 21   | 4 | 5 | 5    |
| Soke        | JADD            | USA     | Epidemiology  | 8065 | 8065 | 4 | 1 | 3    |
| Solomon     | JADD            | USA     | Social        | 25   | 25   | . | 1 | 1    |
| Song        | Autism Research | China   | Psychology    | 33   | 14   | . | 2 | 1    |
| Sowden (1)  | Autism Research | Germany | Psychology    | 105  | 60   | . | 1 | 1    |
| Sowden (2)  | Autism Research | UK      | Psychology    | 36   | 18   | . | 1 | 3    |
| Sparapani   | JADD            | USA     | Social        | 196  | 196  | 4 | 1 | 2    |
| Spriggs     | JADD            | USA     | Interventions | 4    | 4    | 6 | 1 | 2    |
| Stephenson  | JADD            | USA     | Psychology    | 91   | 42   | 4 | 1 | .    |
| Stewart     | JADD            | USA     | Psychology    | 33   | 18   | 4 | 1 | .    |
| Suh         | JADD            | USA     | Psychology    | 72   | 27   | 2 | 1 | 3    |

[Type here]

|                    |                 |           |               |       |      |   |   |         |
|--------------------|-----------------|-----------|---------------|-------|------|---|---|---------|
| Suma               | JADD            | USA       | Interventions | 79    | 44   | 2 | 2 | 3       |
| Sumner             | JADD            | UK        | Psychology    | 95    | 30   | 1 | 1 | 2, 5    |
| Tait               | JADD            | Hong Kong | Diagnosis     | 75    | 75   | 1 | 2 | 3       |
| Takahashi          | JADD            | Japan     | Psychology    | 44    | 17   | 4 | 1 | 5       |
| Tavassoli          | JADD            | USA       | Diagnosis     | 62    | 35   | 4 | 1 | 1       |
| Tavassoli          | Autism Research | USA       | Psychology    | 42    | 21   | . | 1 | 1       |
| Terzi              | JADD            | Greece    | Psychology    | 40    | 20   | 4 | 1 | 1       |
| Thiébaud           | JADD            | UK        | Psychology    | 78    | 35   | 1 | 2 | .       |
| Timonen-Soivio     | JADD            | Finland   | Epidemiology  | 22136 | 4441 | 1 | 5 | 1       |
| Tirado (1)         | JADD            | Spain     | Psychology    | 61    | 21   | 1 | 2 | .       |
| Tirado (2)         | JADD            | Spain     | Psychology    | 66    | 22   | 1 | 2 | .       |
| Trevisan           | MA              | Canada    | Psychology    | 34    | 17   | 1 | 1 | 2, 3, 5 |
| Troyb              | JADD            | USA       | Psychology    | 40    | 40   | 8 | 1 | 3       |
| Turcotte           | JADD            | USA       | Social        | 3297  | 3297 | 1 | 2 | 3       |
| Uljarević          | MA              | Australia | Psychology    | 507   | 169  | 1 | 1 | 3       |
| Uljarević          | Autism Research | UK        | Psychology    | 57    | 57   | . | 1 | 2, 5    |
| Ure                | Autism Research | Australia | Epidemiology  | 57    | 57   | . | 1 | 3       |
| Uzefovsky          | JADD            | UK        | Psychology    | 441   | 201  | 1 | 2 | 5       |
| van Boxtel         | Autism Research | Australia | Psychology    | 33    | 16   | . | 1 | .       |
| Van der Hallen (1) | JADD            | Belgium   | Psychology    | 54    | 21   | 4 | 1 | 1, 2    |
| Van der Hallen (2) | JADD            | Belgium   | Psychology    | 53    | 26   | 4 | 1 | 1, 2    |
| Vanmarcke          | JADD            | Belgium   | Psychology    | 48    | 24   | 1 | 1 | 1       |
| Vanmarcke          | JADD            | Belgium   | Psychology    | 48    | 24   | 1 | 1 | 1       |
| Virk               | Autism          | Denmark   | Epidemiology  | 35059 | 552  |   | 1 | 3       |
| Vivanti            | MA              | Australia | Psychology    | 57    | 36   | 1 | 2 | 1       |

[Type here]

|             |                 |           |               |        |       |   |   |      |
|-------------|-----------------|-----------|---------------|--------|-------|---|---|------|
| Vogan       | JADD            | Canada    | Biology       | 130    | 61    | 1 | 1 | .    |
| Vohra       | JADD            | USA       | Epidemiology  | 102108 | 25527 | 8 | 1 | 1    |
| Walsh       | JADD            | Canada    | Psychology    | 46     | 23    | 1 | 1 | 3, 5 |
| Weiss       | Autism          | Canada    | Social        | 648    | 324   | . | 1 | 5    |
| Wenger      | MA              | USA       | Biology       | 225    | 75    | 4 | 1 | 1    |
| Whitaker    | Autism Research | UK        | Psychology    | 32     | 16    | . | 1 | 2    |
| Wicker      | MA              | France    | Psychology    | 30     | 15    | 4 | 1 | 1    |
| Wilson      | Autism          | UK        | Diagnosis     | 1244   | 874   | . | 1 | 1    |
| Wink        | MA              | USA       | Interventions | 31     | 31    | 4 | 1 | .    |
| Woodman     | JADD            | USA       | Psychology    | 364    | 364   | 3 | 1 | 1, 2 |
| Yakubova    | JADD            | USA       | Interventions | 4      | 4     | 1 | 1 | 2    |
| Yang        | MA              | USA       | Diagnosis     | 101    | 60    | 4 | 2 | .    |
| Yang        | JADD            | Australia | Diagnosis     | 4      | 4     | 4 | 1 | 1    |
| Yin         | MA              | Taiwan    | Biology       | 1428   | 335   | 4 | 1 | 1    |
| Yoshimura   | Autism Research | Japan     | Biology       | 70     | 32    | . | 1 | 1    |
| Young       | JADD            | USA       | Interventions | 77     | 77    | 1 | 1 | 2    |
| Zamora      | JADD            | USA       | Social        | 386    | 302   | 2 | 2 | 1    |
| Zeedyk      | JADD            | USA       | Social        | 127    | 127   | 1 | 1 | 2    |
| Zwaigenbaum | Autism Research | Canada    | Diagnosis     | 381    | 103   | . | 1 | 1    |
